# Supplementary material for: Polydopamine-functionalized multi-walled carbon nanotubes-supported palladium–lead bimetallic alloy nanoparticles as highly efficient and robust catalysts for ethanol oxidation
Source: Royal Society of Chemistry journal article supplement (doi:10.1039/c6ra17089g), 2016-01-01
Supplement: c6ra17089g1.pdf [file c6ra17089g1.pdf]

## **Supplementary Materials**

### **Polydopamine functionalized multi-walled carbon nanotubes supported palladium-lead bimetallic alloy nanoparticles as highly efficient and robust catalyst for ethanol oxidation**

**Honglei Yang\*, Siyi Kang, Hai Zou, Jun Jin, Jiantai Ma and Shuwen Li\***

State Key Laboratory of Applied Organic Chemistry, Gansu Provincial Engineering  
Laboratory for Chemical Catalysis, College of Chemistry and Chemical Engineering,  
Lanzhou University, Lanzhou 730000, P. R. China

\* Corresponding authors. Tel./fax: +86 931 8912577.

E-mail addresses: yanghl@lzu.edu.cn (Honglei Yang),

lishw@lzu.edu.cn (Shuwen Li).

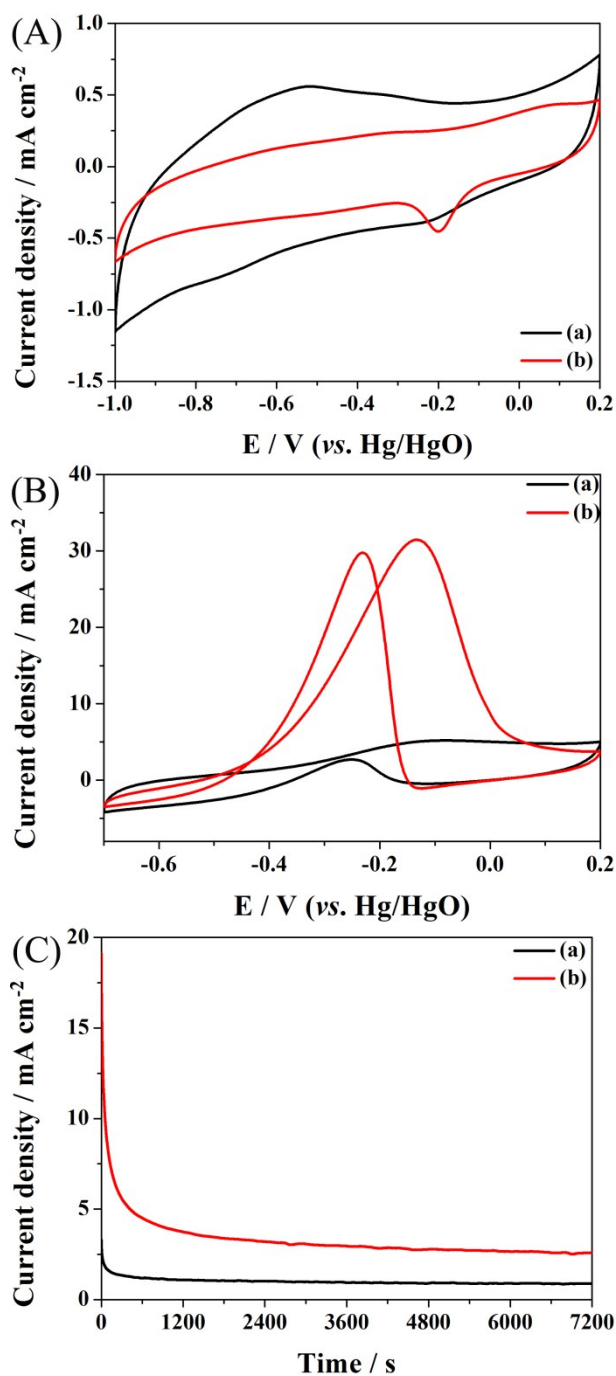

**Fig. S1** CV curves of (a) Pd/PDA and (b) Pd<sub>3</sub>Pb/MWCNTs in 1 M KOH solution (A), and in nitrogen-saturated 1 M KOH + 1 M C<sub>2</sub>H<sub>5</sub>OH solution (B) at a scan rate of 50 mV s<sup>-1</sup>. (C) Chronoamperometric curves of (a) Pd/PDA and (b) Pd<sub>3</sub>Pb/MWCNTs for ethanol electrooxidation at -0.20 V in nitrogen-saturated 1 M KOH + 1 M C<sub>2</sub>H<sub>5</sub>OH solution.

**Table S1** Comparison of electrocatalytic activity with different catalysts.

| Catalysts                 | ECSA (m <sup>2</sup> g <sup>-1</sup> ) | $E_{\text{onset}}$ (V vs. Hg/HgO) | $I_f$ (mA mg <sup>-1</sup> ) | $I_s$ (mA mg <sup>-1</sup> ) |
|---------------------------|----------------------------------------|-----------------------------------|------------------------------|------------------------------|
| Pd/PDA                    | 4.7                                    | -0.38                             | 5.2                          | 1.0                          |
| Pd <sub>3</sub> Pb/MWCNTs | 10.6                                   | -0.49                             | 31.9                         | 2.6                          |

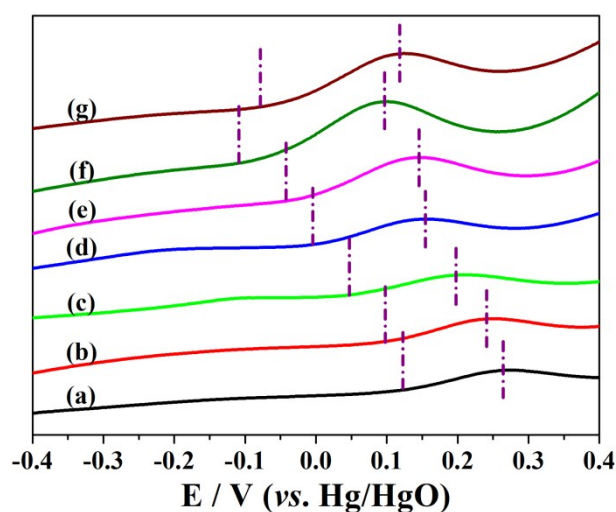

**Fig. S2** CO stripping curves in 1 M KOH solution for (a) Pd/PDA, (b) Pd/MWCNTs, (c) Pd/PDA-MWCNTs, (d) Pd<sub>3</sub>Pb/MWCNTs, (e) Pd<sub>5</sub>Pb/PDA-MWCNTs, (f) Pd<sub>3</sub>Pb/PDA-MWCNTs and (g) PdPb/PDA-MWCNTs.

**Table S2** Parameters obtained from CO stripping curves

| Catalysts                     | $E^{\text{co}}_{\text{onset}}$ (V vs. Hg/HgO) | $E^{\text{co}}_{\text{f}}$ (V vs. Hg/HgO) |
|-------------------------------|-----------------------------------------------|-------------------------------------------|
| Pd/PDA                        | 0.123                                         | 0.264                                     |
| Pd/MWCNTs                     | 0.098                                         | 0.241                                     |
| Pd/PDA-MWCNTs                 | 0.047                                         | 0.197                                     |
| Pd <sub>3</sub> Pd/MWCNTs     | -0.006                                        | 0.154                                     |
| Pd <sub>5</sub> Pd/PDA-MWCNTs | -0.042                                        | 0.147                                     |
| Pd <sub>3</sub> Pd/PDA-MWCNTs | -0.109                                        | 0.101                                     |
| PdPb/PDA-MWCNTs               | -0.078                                        | 0.117                                     |

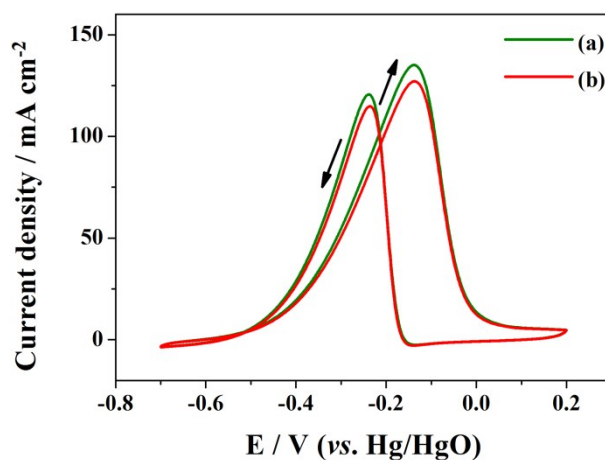

**Fig. S3.** (A) CV scans of Pd<sub>3</sub>Pb/PDA-MWCNTs before (a) and after 500 cycles (b) in nitrogen-saturated 1 M KOH + 1 M C<sub>2</sub>H<sub>5</sub>OH solution at a scan rate of 50 mV s<sup>-1</sup>.
